# Supplementary material for: Keratin 8 reduces colonic permeability and maintains gut microbiota homeostasis, protecting against colitis and colitis-associated tumorigenesis
Source: PubMed Central journal article supplement (PMC5722522; doi:10.18632/oncotarget.18241), 2017-05-27
Supplement: oncotarget-08-96774-s001.pdf [file oncotarget-08-96774-s001.pdf]

# Keratin 8 reduces colonic permeability and maintains gut microbiota homeostasis, protecting against colitis and colitis-associated tumorigenesis

## Supplementary Materials

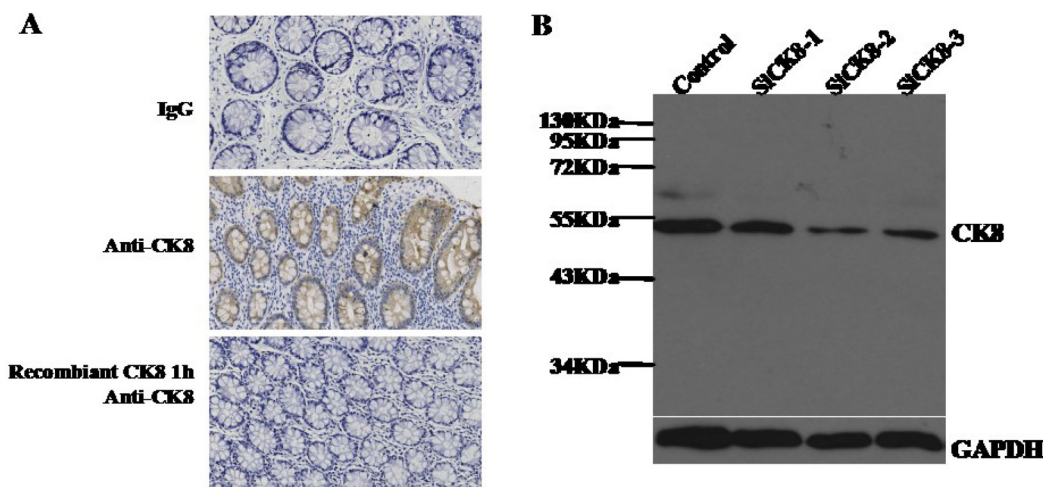

**Supplementary Figure 1: The validation of the specificity of CK8 antibody.** (A) Immunohistochemical staining for colon cancer specimens incubated with IgG or CK8-specific antibody. To validate the specificity, monoclonal antibody to CK8 was pre-incubated with recombinant CK8 protein for 1 h prior to applying to tissue. (B) HT29 cells were transfected with control or CK8 siRNA, and the expression of CK8 was investigated with Western blot analysis.

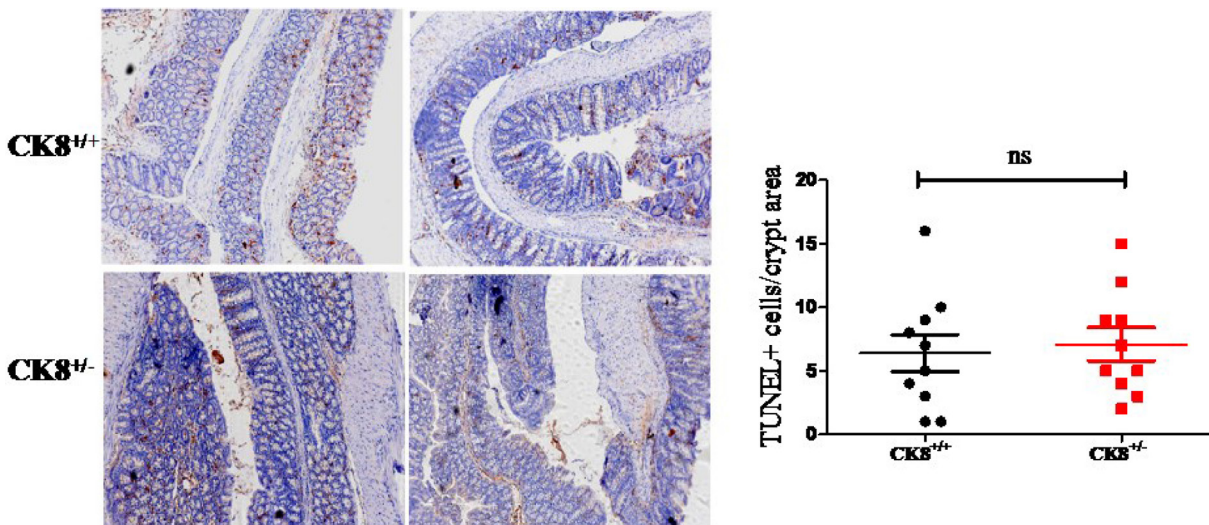

**Supplementary Figure 2: The apoptosis analysis in CK8<sup>+/-</sup> and CK8<sup>+/+</sup> colons with tumors.** CK8<sup>+/+</sup> mice and CK8<sup>+/-</sup> mice were treated with AOM/DSS as Material and Methods described. The apoptosis in colons were measured using TUNEL assay.

**Supplementary Table 1: Real-time quantitative PCR primers**

|            |                                        |
|------------|----------------------------------------|
| β-catenin  | Forward primer:ATGGAGCCGGACAGAAAAGC    |
|            | Reverse primer:CTTGCCACTCAGGGAAGGA     |
| E-cadherin | Forward primer:CAGGTCTCCTCATGGCTTTGC   |
|            | Reverse primer:CTTCCGAAAAGAAGGCTGTCC   |
| MMP2       | Forward primer:CAAGTTCCCCGGCGATGTC     |
|            | Reverse primer:TTCTGGTCAAGGTCACCTGTC   |
| MMP9       | Forward primer:CTGGACAGCCAGACACTAAAG   |
|            | Reverse primer:CTCGCGGCAAGTCTTCAGAG    |
| TNFα       | Forward primer:CCTCTCTCTAATCAGCCCTCTG  |
|            | Reverse primer:GAGGACCTGGGAGTAGATGAG   |
| IL-1α      | Forward primer:GTGTTGCTGAAGGAGTTGCC    |
|            | Reverse primer:CGACTTTGTTCTTTGGTGGC    |
| IL-1β      | Forward primer:GCTTCAGGCAGGCAGTA       |
|            | Reverse primer:TGAGTCACAGAGGATGGG      |
| IFNγ       | Forward primer:TCGGTAACTGACTTGAATGTCCA |
|            | Reverse primer:TCGCTTCCCTGTTTTAGCTGC   |
| IL-4       | Forward primer:GGTCTCAACCCCCAGCTAGT    |
|            | Reverse primer:GCCGATGATCTCTCTCAAGTGAT |
| IL-17      | Forward primer:TTAACTCCCTTGGCGCAAAA    |
|            | Reverse primer:CTTCCCTCCGCATTGACAC     |
| CCL4       | Forward primer:TTCCTGCTGTTTCTCTTACACCT |
|            | Reverse primer:CTGTCTGCCTCTTTTGGTCAG   |
| iNOS       | Forward primer:ACATCGACCCGTCCACAGTAT   |
|            | Reverse primer:CAGAGGGGTAGGCTTGTCTC    |
| KC         | Forward primer:CTGGGATTCACCTCAAGAACATC |
|            | Reverse primer:CAGGGTCAAGGCAAGCCTC     |

**Supplementary Table 2: Relative contribution in the gut microbiota of CK8<sup>+/-</sup> and CK8<sup>+/+</sup> CRC mice. See Supplementary\_Table\_2**
